# Supplementary material
Source: publisher figshare collection journal article supplement (https://karger.figshare.com/articles/dataset/_/4535513)
Supplement: Supplementary file 1 [file 1]

Archive with 10 entries (10 files):
- Supple Table 2.PDF
- PAT_201502004_1_3.docx
- Supple Fig. 3a.tif
- Supple Fig. 3b.tif
- Supple Fig. 3c.tif
- Supple Fig. 3d.tif
- Supple Fig. 3e.tif
- Supple Fig. 3f.tif
- Supple Figure Legends.PDF
- Supple Table 1.PDF
