# Supplementary material
Source: publisher figshare collection journal article supplement (https://karger.figshare.com/articles/dataset/_/4535513)
Supplement: Supplementary file 1 [file 1 › PAT_201502004_1_3.docx]

**SUPPLEMENTARY MATERIAL**

**Supplementary figure legends**

**Supplementary figure 1**

Panel A represents a survival plot of all OSCC patients (n=83) included in this study. Each mark (+) represents a censored event. The first censored event occurs after 5 years of follow-up.

Panel B represents a Kaplan-Meiersurvival plot (n=83) stratified in accordance to gender.

Panel C represents a Kaplan-Meier survival plot (n=83) stratified in accordance to nodal status (pN).

Panel D represents a Kaplan-Meier survival plot (n=83) stratified for stage.

Group comparison was performed using log-rank tests.

**Supplementary figure 2**

Boxplotof all included OSCC patients (n=83) showing the difference in gene expression of KLK5, KLK7 and SPINK5 between patients with and without lymph node metastasis. Cases were stratified according nodal status on the x-axis; pN0 (blue) versus pN+ (red). On the y-axis gene expression values are calculated by the formula log2 (sample/reference pool) in which the reference pool is the mean of all included samples. P-values represent the Logistic regression test of this group comparison and therefore differ from the significance levels of the Mann-Whitney analysis in table 2.

**Supplementary figure 3**

Kaplan-Meieroverallsurvival plots of all OSCC patients (n=83) included in the expression analysis in this study, stratified for gene expression of KLK5, KLK7 and SPINK5 shown in panel A-C, and stratified for protein expression of KLK5, KLK7 and SPINK5 in panel D-F.

Panel A-C: Cases were stratified according to mRNA expression levels < median (red) versus mRNA expression levels > median (blue) for KLK5 in panel A, for KLK7 in panel B, and for SPINK5 in panel C.

P-values represent the Log-rank test of this group comparison and therefore differ from the significance levels of the Cox-regression analysis, see suppl. table 1.

Panel D-F: Cases were stratified according to protein expression dichotomized to the product score (intensity x proportion) 0 versus 1-200 for KLK5 in panel D, for KLK7 in panel E, and for SPINK5 in panel F.

P-values represent the Log-rank test of this group comparison and therefore differ from the significance levels of the Cox-regression model, see table 3a.
