# Supplementary material
Source: publisher figshare collection journal article supplement (https://karger.figshare.com/articles/dataset/_/4535513)
Supplement: Supplementary file 1 [file 1 › Supple Table 1.PDF]

### Supplementary table 1

Univariate Cox regression survival analysis for mRNA expression of KLK5, KLK7 and SPINK5 in the OSCC cohort (n=83).

| univariate Cox regression analysis |      |           |         |
|------------------------------------|------|-----------|---------|
| gene                               | HR   | 95% CI    | p-value |
| KLK5                               | 1.41 | 0.27-7.36 | 0.687   |
| KLK7                               | 0.55 | 0.27-1.14 | 0.106   |
| SPINK5                             | 1.33 | 0.54-3.31 | 0.538   |

HR = hazard ratio, p-value of the Cox regression analysis,  
95% CI = 95% confidence interval
