# Supplementary material
Source: publisher figshare collection journal article supplement (https://karger.figshare.com/articles/dataset/_/4535513)
Supplement: Supplementary file 1 [file 1 › Supple Table 2.PDF]

## Supplementary table 2

Supplementary table 2

| Variable                      | KLK5                |      | KLK7 |      | SPINK5 |      | co-expression<br>KLK5 & KLK7 |    |      |
|-------------------------------|---------------------|------|------|------|--------|------|------------------------------|----|------|
| Number (%) of 332 cores       |                     |      |      |      |        |      |                              |    |      |
| Tumour                        | 226                 | (68) | 224  | (67) | 221    | (67) |                              |    |      |
| No tumour                     | 49                  | (15) | 54   | (16) | 55     | (17) |                              |    |      |
| No core                       | 57                  | (17) | 54   | (16) | 56     | (17) |                              |    |      |
| Number of cores / case (n=83) |                     |      |      |      |        |      |                              |    |      |
| 4                             | 27                  |      | 26   |      | 28     |      |                              |    |      |
| 3                             | 30                  |      | 27   |      | 23     |      |                              |    |      |
| 2                             | 12                  |      | 15   |      | 15     |      |                              |    |      |
| 1                             | 7                   |      | 9    |      | 10     |      |                              |    |      |
| 0                             | 7                   |      | 6    |      | 7      |      |                              |    |      |
| Score (%) / case (n=83)       |                     |      |      |      |        |      |                              |    |      |
| 0                             | (total loss)        | 37   | (45) | 19   | (23)   | 21   | (25)                         | 17 | (20) |
| 1-50                          | (almost total loss) | 22   | (26) | 30   | (36)   | 28   | (34)                         |    |      |
| 51-200                        | (partial loss)      | 10   | (12) | 19   | (23)   | 17   | (20)                         |    |      |
| missing                       |                     | 14   | (17) | 15   | (18)   | 17   | (20)                         | 16 | (19) |
| >1                            |                     |      |      |      |        |      |                              | 50 | (60) |

Immunohistochemical descriptive results of protein expression of KLK5, KLK7 and SPINK5 in the OSCC TMA cohort (n=83).

Percentages may not total 100 because of rounding.
